# Supplementary material for: Leisure boat harbours, hidden alien species, and pollution: a case study of Hinsholmskilen harbour (Gothenburg, Sweden)
Source: Copernicus journal article supplement (doi:10.5194/jm-44-119-2025), 2025-05-26
Supplement: Supplementary file 1 [file jm-44-119-2025-supplement.zip]

## Sheet: Sheet1
Supplement S5: Foraminiferal census data (morphological analysis) including, relative abudances, absolute abudances and raw data.
Relative abundances (%)			>10 %		5-10%	2-5%									Absolute abundances (ind. g-1 dry sed.)																Raw data (counted ind.)
Stations	Ammonia sp.	Elphidium albiumbilicatum	Elphidium clavatum	Elphidium oceanense	Elphidium selseyensis	Elphidium williamsoni	Haynesina germanica	Milliammina fusca	Quinqueloculina seminula	Quinqueloculina jugosa	Trochammina hadai	Remarks				Ammonia sp.	Elphidium albiumbilicatum	Elphidium clavatum	Elphidium oceanense	Elphidium selseyensis	Elphidium williamsoni	Haynesina germanica	Milliammina fusca	Quinqueloculina seminula	Quinqueloculina jugosa	Trochamminia hadai	Total ind g-1 dry sed.					Ammonia sp.	Elphidium albiumbilicatum	E. clavatum	E. oceanense	E. selseyensis	E. williamsoni	Haynesina germanica	Milliammina fusca	Quinqueloculina seminula	Quinqueloculina jugosa	Trochammina hadai	Total counted ind.	Sample weight (g)	Tray squares counted	Split
HN 1	71.5	2.3	0.6		1.6	1	2.6		7.8	4.5	8.1				HN 1	178.9	5.7	1.6		4	2.4	6.5		19.4	11.3	20.2	250.2				HN 1	221	7	2		5	3	8		24	14	25	309	4.94	45	0.25
HN 2	72.6		1.1	1.1	4.3	1.1	2.5	1.1	2.5	5.3	8.5				HN 2	192		2.8	2.8	11.2	2.8	6.6	2.8	6.6	14.1	22.5	264.2				HN 2	205		3	3	12	3	7	3	7	15	24	282	4.27	45	0.25
HN 5	58	2.1	1.1		2.5	4.6	3.5		16.6	8.8	2.8				HN 5	86.8	3.2	1.6		3.7	6.9	5.3		24.9	13.2	4.2	149.7				HN 5	164	6	3		7	13	10		47	25	8	283	7.56	45	0.25
HN 6	56.5	2.4	3	0.9	1.8	4.8	13.7		8.6	1.5	6.8				HN 6	161	6.8	8.5	2.5	5.1	13.6	39		24.6	4.2	19.5	284.7				HN 6	190	8	10	3	6	16	46		29	5	23	336	4.72	45	0.25
HN 9	67.7	1.7	2.8	4.5	1.4	3.1	3.4		8.1	3.9	3.4				HN 9	233.4	5.8	9.7	15.5	4.8	10.7	11.6		28.1	13.6	11.6	344.8				HN 9	241	6	10	16	5	11	12		29	14	12	356	4.13	45	0.25
HN 10	59.8	3.8	1.9	2.9	1.3	7.3	6.4	1.6	5.8	3.2	6.1				HN 10	193.3	12.4	6.2	9.3	4.1	23.8	20.7	5.2	18.6	10.3	19.6	323.5				HN 10	187	12	6	9	4	23	20	5	18	10	19	313	3.87	45	0.25
HN 11	53	4	5.2	2.1	3.4	2.1	3.7		14.6	6.1	5.2				HN 11	135.2	10.1	13.2	5.4	8.5	5.4	9.3		37.3	15.5	13.2	253.2				HN 11	174	13	17	7	11	7	12		48	20	17	328	5.15	45	0.25
HN 12	59	2.4	3.4	0.7	1	3.9	2.4	2.7	3.2	0.5	20.4				HN 12	185.5	7.6	10.7	2.3	3.1	12.2	7.6	8.4	9.9	1.5	64.1	313				HN 12	243	10	14	3	4	16	10	11	13	2	84	412	5.24	45	0.25
HN 13	35.6	2.6	1.6	2.6	0.3	2.9	5.2	13.9	21.4	12.6	1.3				HN 13	62	4.5	2.8	4.5	0.6	5.1	9	24.2	37.2	22	2.3	174.1				HN 13	110	8	5	8	1	9	16	43	66	39	4	309	7.1	45	0.25
HN 16	23.4		2.6	5.3	0.7	2.3	0.3		56.6	6.3	2.6				HN 16	96.9		10.9	21.8	2.7	9.6	1.4		234.8	25.9	10.9	415				HN 16	71		8	16	2	7	1		172	19	8	304	2.93	45	0.25
HN 18	15.2	0.6	0.9	0.9	0.3	1.9	1.9	4.4	57.9	14.5	1.6				HN 18	38.7	1.6	2.4	2.4	0.8	4.8	4.8	11.3	148.7	37.2	4	257				HN 18	48	2	3	3	1	6	6	14	184	46	5	318	4.95	45	0.25
HN 20	69.6	1.6	4.2	2.3	1.6	2.6	3.9	2.9	4.6	3.3	3.3				HN 20	276.6	6.5	16.9	9.1	6.5	10.4	15.6	11.7	18.2	13	13	397.4				HN 20	213	5	13	7	5	8	12	9	14	10	10	306	3.08	45	0.25
HN 23	81.5	1.2	2.6	1.6	1.2	2	2.6		2.2		5.3				HN 23	238.1	3.5	7.5	4.6	3.5	5.8	7.5		6.3		15.6	292.2				HN 23	413	6	13	8	6	10	13		11		27	507	6.94	45	0.25
HN 25	54.6	1.3	5.3	4.9		16.4	4.3	4.3	5.3	3.6					HN 25	188.6	4.5	18.2	17		56.8	14.8	14.8	18.2	12.5		345.5				HN 25	166	4	16	15		50	13	13	16	11		304	3.52	45	0.25
HN 27												barren			HN 27													barren			HN 27													0.59	45	0.25	barren
HN 28	32.4	1.3	8.6	5.8		6.6	3.5	1.5	34.6	5.8					HN 28	191	7.5	50.7	34.3		38.8	20.9	9	204.5	34.3		591				HN 28	128	5	34	23		26	14	6	137	23		396	2.68	45	0.25
HN 29	55.4	0.9		4.1	3.2	2.2	4.7	0.9	16.1	6.6	5.7				HN 29	172.8	3		12.8	9.9	6.9	14.8	3	50.4	20.7	17.8	312.1				HN 29	175	3		13	10	7	15	3	51	21	18	316	4.05	45	0.25
HN 30	28.3	1.3	0.3	6.7	1	2.7	1.7	16.4	32.4	6.4	2.7				HN 30	96.9	4.6	1.1	22.8	3.4	9.1	5.7	55.8	110.5	21.7	9.1	340.7				HN 30	85	4	1	20	3	8	5	49	97	19	8	299	3.51	45	0.25
HN 32												barren			HN 32													barren			HN 32													5.63	45	0.25	barren
HN 33												barren			HN 33													barren			HN 33													3.87	45	0.25	barren
HN 34												barren			HN 34													barren			HN 34													3.48	45	0.25	barren
HN 35												barren			HN 35													barren			HN 35													3.26	45	0.25	barren
HN 36	64.1					0.7	3		12.5	4.6	15.2				HN 36	152.7					1.6	7.1		29.9	11	36.2	238.6				HN 36	194					2	9		38	14	46	303	5.08	45	0.25
