# Supplementary material for: Leisure boat harbours, hidden alien species, and pollution: a case study of Hinsholmskilen harbour (Gothenburg, Sweden)
Source: Copernicus journal article supplement (doi:10.5194/jm-44-119-2025), 2025-05-26
Supplement: Supplementary file 1 [file jm-44-119-2025-supplement.zip]

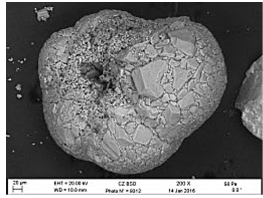

GF267bis-Trochammina.tif

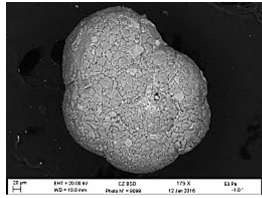

GF267-Trochammina.tif

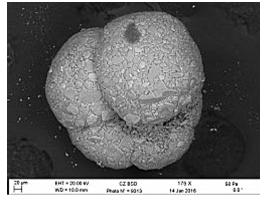

GF268bis-Trochammina.tif

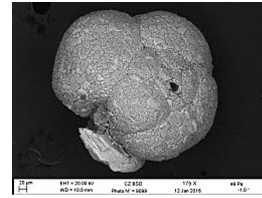

GF268-Trochammina.tif

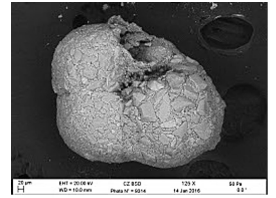

GF269bis-Trochammina.tif

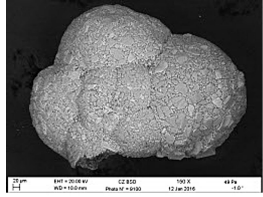

GF269-Trochammina.tif

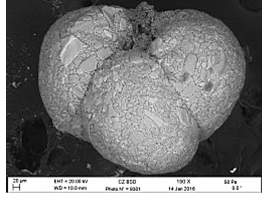

GF256bis-Trochammina.tif

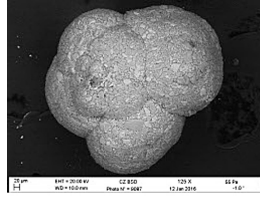

GF256-Trochammina.tif

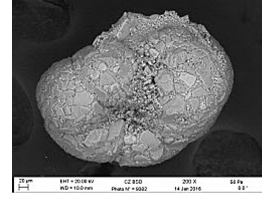

GF257bis-Trochammina.tif

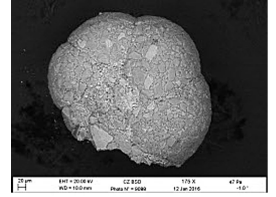

GF257-Trochammina.tif

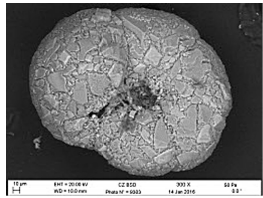

GF258bis-Trochammina.tif

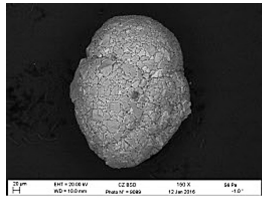

GF258-Trochammina.tif

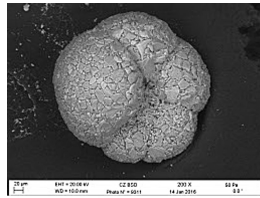

GF266bis-Trochammina.tif

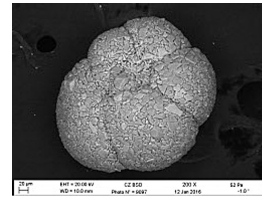

GF266-Trochammina.tif
