# Supplementary material for: Leisure boat harbours, hidden alien species, and pollution: a case study of Hinsholmskilen harbour (Gothenburg, Sweden)
Source: Copernicus journal article supplement (doi:10.5194/jm-44-119-2025), 2025-05-26
Supplement: Supplementary file 2 [file jm-44-119-2025-supplement.zip]

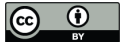

*Supplement of*

**Leisure boat harbours, hidden alien species, and pollution: a case study of Hinsholmskilen harbour (Gothenburg, Sweden)**

**Irina Polovodova Asteman et al.**

*Correspondence to:* Irina Polovodova Asteman ([irina.polovodova@marine.gu.se](mailto:irina.polovodova@marine.gu.se))

- [jm-44-119-2025-supplement-title-page.pdf](#)
- Supplements
  - [Supplement S1-S3.xlsx](#)
  - [Supplement S7.xlsx](#)
  - [Supplement\\_S4.pdf](#)
  - [Supplement\\_S5.xlsx](#)
  - [Supplement\\_S6.pdf](#)

The copyright of individual parts of the supplement might differ from the article licence.
