# Supplementary material for: Leisure boat harbours, hidden alien species, and pollution: a case study of Hinsholmskilen harbour (Gothenburg, Sweden)
Source: Copernicus journal article supplement (doi:10.5194/jm-44-119-2025), 2025-05-26
Supplement: Supplementary file 3 [file jm-44-119-2025-supplement.zip]

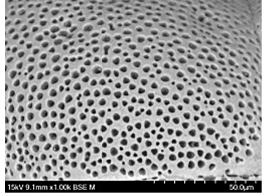

HH003-Ammonia\_pores.tif

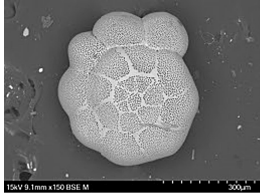

HH003-Ammonia\_S.tif

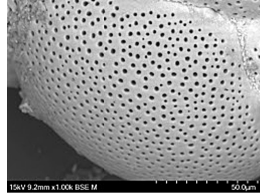

HH004-Ammonia\_pores.tif

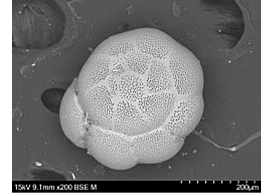

HH004-Ammonia\_S.tif

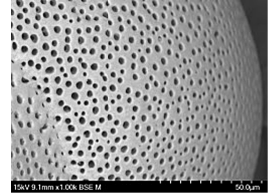

HH005-Ammonia\_pores.tif

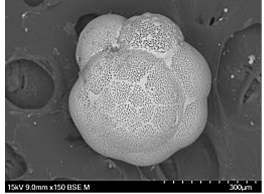

HH005-Ammonia\_S.tif

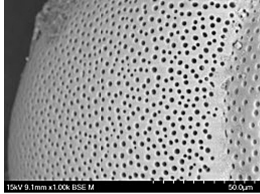

HH006-Ammonia\_pores.tif

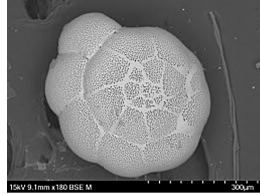

HH006-Ammonia\_S.tif

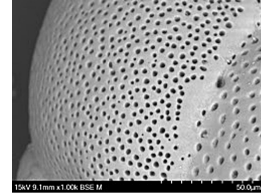

HH007-Ammonia\_pores.tif

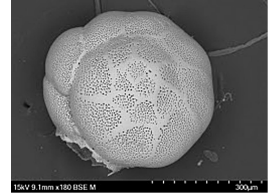

HH007-Ammonia\_S.tif

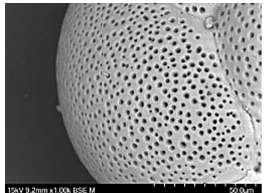

HH008-Ammonia\_pores.tif

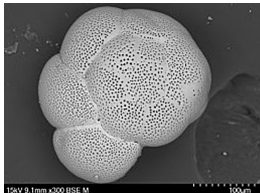

HH008-Ammonia\_S.tif

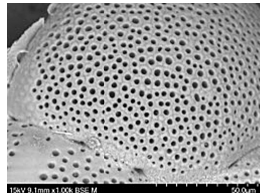

HH009-Ammonia\_pores.tif

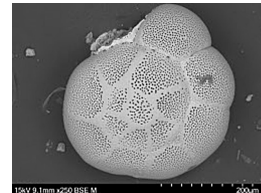

HH009-Ammonia\_S.tif

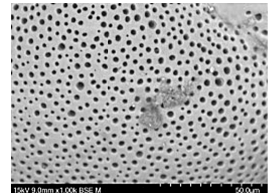

HH010-Ammonia\_pores.tif

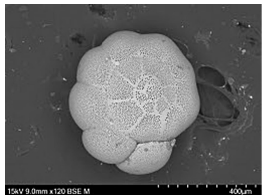

HH010-Ammonia\_S.tif

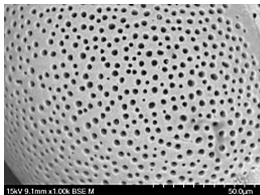

HH011-Ammonia\_pores.tif

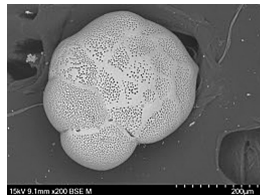

HH011-Ammonia\_S.tif

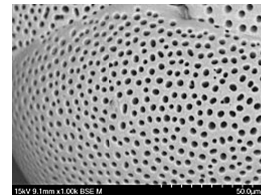

HH012-Ammonia\_pores.tif

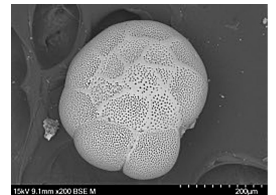

HH012-Ammonia\_S.tif

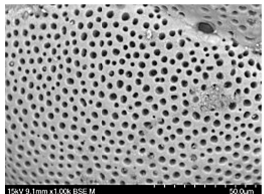

HH013-Ammonia\_pores.tif

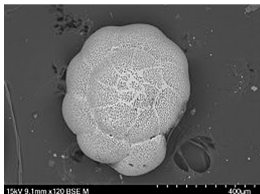

HH013-Ammonia\_S.tif

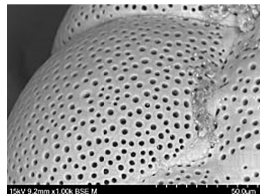

HH014-Ammonia\_pores.tif

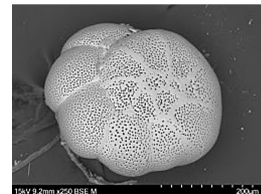

HH014-Ammonia\_S.tif

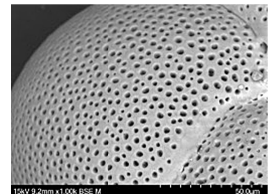

HH015-Ammonia\_pores.tif

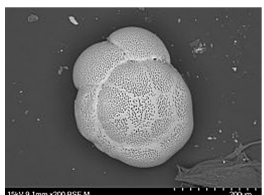

HH015-Ammonia\_S.tif

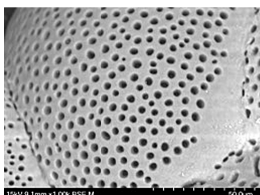

HH016-Ammonia\_pores.tif

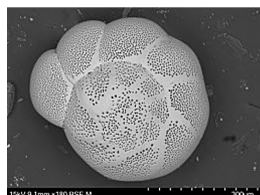

HH016-Ammonia\_S.tif

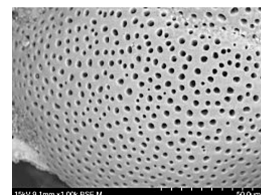

HH017-Ammonia\_pores.tif

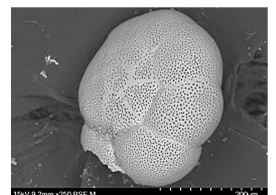

HH017-Ammonia\_S.tif

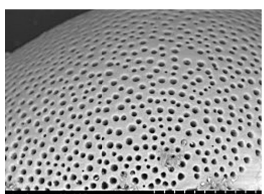

HH018-Ammonia\_pores.tif

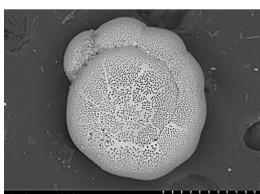

HH018-Ammonia\_S.tif

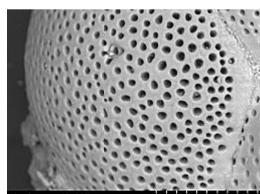

HH019-Ammonia\_pores.tif

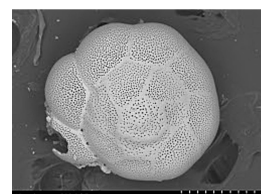

HH019-Ammonia\_S.tif

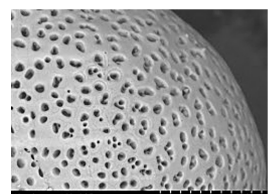

HH020-Ammonia\_pores.tif

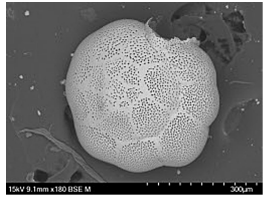

HH020-Ammonia\_S.tif

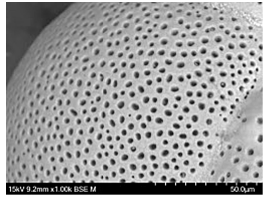

HH021-Ammonia\_pores.tif

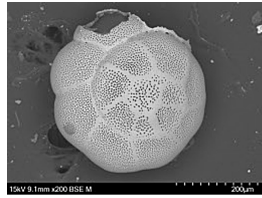

HH021-Ammonia\_S.tif

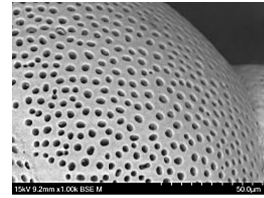

HH022-Ammonia\_pores.tif

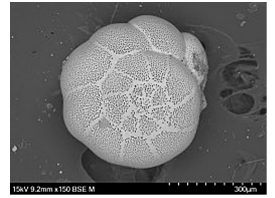

HH022-Ammonia\_S.tif

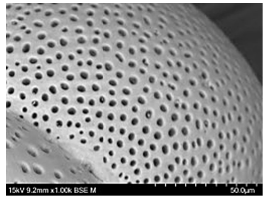

HH023-Ammonia\_pores.tif

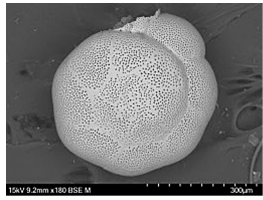

HH023-Ammonia\_S.tif

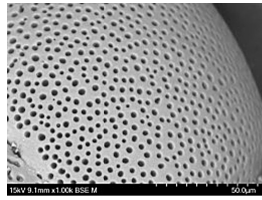

HH024-Ammonia\_pores.tif

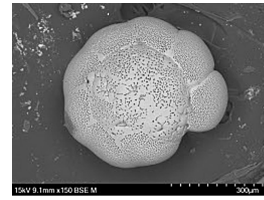

HH024-Ammonia\_S.tif

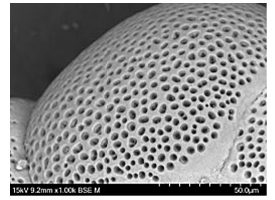

HH025-Ammonia\_pores.tif

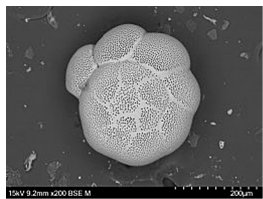

HH025-Ammonia\_S.tif

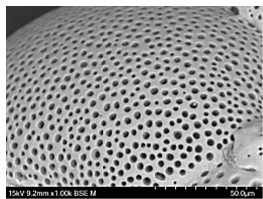

HH026-Ammonia\_pores.tif

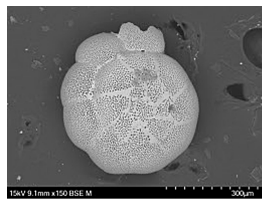

HH026-Ammonia\_S.tif

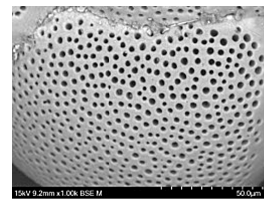

HH027-Ammonia\_pores.tif

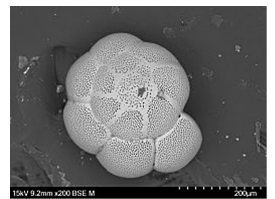

HH027-Ammonia\_S.tif

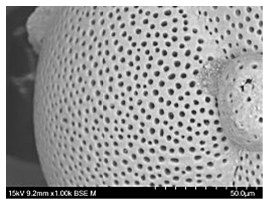

HH028-Ammonia\_pores.tif

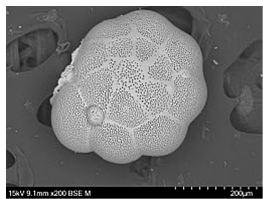

HH028-Ammonia\_S.tif

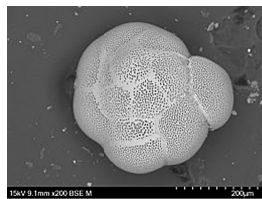

HH029-A\_confertitesta\_S.tif

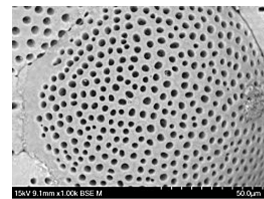

HH029-Ammonia\_pores.tif

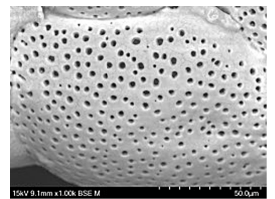

HH001-Ammonia\_pores.tif

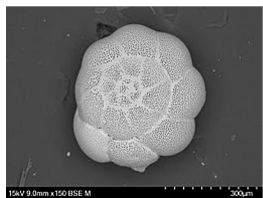

HH001-Ammonia\_S.tif

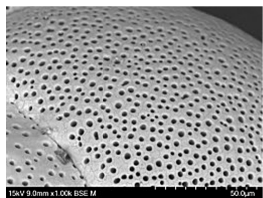

HH002-Ammonia\_pores.tif

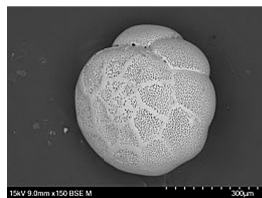

HH002-Ammonia\_S.tif
